# Supplementary material for: Hepatocyte-derived FGL1 accelerates liver metastasis and tumor growth by inhibiting CD8+ T and NK cells
Source: JCI journal article supplement (doi:10.1172/jci.insight.173215), 2024-05-23
Supplement: sd1 [file 1]

## 1 Supplemental Materials and Methods

### 2 Generation and identification of *Fgl1*-deficient mice

3 *Fgl1*-deficient mice were generated by a CRISPR/Cas9-mediated genome engineering strategy. Two guide RNAs directed  
4 Cas9 to excise exons 2-3 for a total of 1125 bp of the region, including the 250 bp coding sequence of *Fgl1* (sg1:  
5 GTTATTTCTAAGCTTCGATGGGG; sg2: CAGAAAGACCGTTAAGTACC-AGG), resulting in a functional knockout  
6 of the *Fgl1* gene. To identify the genotypes of the mice, total DNA was extracted using tail lysis buffer (prepared by Tris-  
7 HCl, EDTA, SDS, and NaCl) and proteinase K (TransGen Biotech, Beijing, China). PCR amplification was performed  
8 with the following primers: *Fgl1*-F, CACACCAGCCTCCTCTTAACAA; *Fgl1*-R, GTGAGTCATGTTGCTAATCATT  
9 GGA; and *Fgl1*-R', CCAACCTTCCCTTCCCATCATC. The size of the gene amplification products in the WT mice was  
10 490 bp, and that in the *Fgl1*-deficient mice was 788 bp.

### 12 Immunoblotting

13 Total protein was extracted using RIPA lysis buffer (Servicebio, Wuhan, China) supplemented with protease inhibitor  
14 (Beyotime, Shanghai, China). Equal amounts of protein from the lysate were subjected to precast 4–20% Bis-Tris protein  
15 gels (GenScript Biotech, Nanjing, China) and separated proteins were transferred onto polyvinylidene difluoride (PVDF)  
16 membranes (Millipore, Bedford, MA, USA). The membranes were blocked with 5% (w/v) skim milk for 1 h at room  
17 temperature. After that, the membranes were incubated with primary antibodies against FGL1 (Proteintech, Chicago, IL,  
18 USA) and  $\beta$ -tubulin (Cell Signaling Technology, Boston, MA, USA) in 5% (w/v) skim milk in Tris-buffered saline  
19 containing 0.1% Tween-20 at 4°C overnight, and then incubated with anti-rabbit IgG and HRP-linked Ab (Cell Signaling  
20 Technology, Boston, MA, USA) for 1 h at room temperature. Chemiluminescence signals were captured with an  
21 Amersham Imager 600 (GE Healthcare, Chicago, IL, USA).

### 23 Histology

24 Liver samples were harvested and fixed in 4% paraformaldehyde (Servicebio, Wuhan, China) for at least 24 hours, then  
25 processed and embedded in paraffin, after which sections were prepared. The sections (3  $\mu$ m) were dewaxed and  
26 rehydrated, followed by hematoxylin and eosin (HE) staining or immunohistochemical (IHC) staining. Sections for HE  
27 were photographed using a digital slide scanner (Pannoramic MIDI; 3DHISTECH, Budapest, Hungary) with CaseViewer  
28 software. For IHC staining, the sections were processed by heat-induced epitope retrieval in citric acid buffer (pH 6.0).  
29 An anti-FGL1 polyclonal antibody (Proteintech, Chicago, IL, USA) was used for immunostaining. After incubation with  
30 the primary antibody, the sections were incubated with the secondary antibody (Zhong Shan-Golden Bridge Biological  
31 Technology, Beijing, China) subsequently incubated with a 1 $\times$  DAB reaction mixture (Cell Signaling Technology, Boston,  
32 MA, USA), and finally stained with hematoxylin. Sections for IHC were photographed using an optical microscope  
33 (ZEISS Axio Imager.A2, Jena, Germany).

34

### 35 **Multiplex cytokine analysis**

36 The serum of *Fgl1*<sup>+/+</sup> mice and *Fgl1*<sup>-/-</sup> mice was harvested, and cytokines (IL-1 $\alpha$ , IL-6, IFN- $\gamma$  and TNF- $\alpha$ ) in the serum  
37 were detected with a Luminex 200 system (Luminex) by Univ-bio Company (Univ-bio, Shanghai, China).

38

### 39 **Hepatocyte and nonparenchymal cell isolation**

40 Livers were perfused with 0.5 mM EGTA solution (pH 7.2) and digested using Dulbecco's modified Eagle's medium  
41 (DMEM, HyClone, South Logan, UT, USA) supplemented with 0.075% (w/v) type I collagenase (Sigma-Aldrich, St.  
42 Louis, MO, USA) at 37°C. Isolated cells were resuspended in serum-free DMEM (HyClone, South Logan, UT, USA),  
43 and hepatocytes were collected following 60% (v/v) Percoll solution (GE Healthcare, Chicago, IL, USA) density gradient  
44 centrifugation. To obtain hepatic nonparenchymal cells (NPCs), livers were perfused with 0.5 mM EGTA solution (pH  
45 7.2) and DMEM supplemented with 0.04% (w/v) type IV collagenase (Sigma-Aldrich, St. Louis, MO, USA) and digested  
46 with DMEM supplemented with 0.08% (w/v) type IV collagenase and DNase I (Sigma-Aldrich, St. Louis, MO, USA) at

47 37°C. Isolated cells were centrifuged followed by 40% (v/v) Percoll gradient density centrifugation to collect NPCs.  
48 Subsequently, hepatocytes and NPCs were subjected to mRNA extraction and real-time PCR.

49

#### 50 **Measurement of the serum levels of ALT and AST**

51 Serum levels of alanine aminotransferase (ALT) and aspartate aminotransferase (AST) were measured using a diagnostic  
52 kit (DIRUI, Changchun, China) according to the manufacturer's protocol with a biochemical analyzer (Rayto, Shenzhen,  
53 China).

54

#### 55 **Cell proliferation assay**

56 MC38, B16-F10, and Hepa1-6 cells were seeded into 96-well plates at 5,000 cells/well, cultured for 24h, and then treated  
57 with the indicated concentrations of recombinant mouse FGL1 protein (CUSABIO, Wuhan, China). The proliferative  
58 capacity of the cells was tested after 24 h by adding 10 µL CCK8 chemicals (GLPBIO, Montclair, CA, USA), and  
59 incubating at 37°C for 1.5 h, after which the optical density (OD) at 450 nm was detected.

60

#### 61 **Wound healing assay**

62 To investigate the effect of FGL1 on the migration of MC38, B16-F10 and Hepa1-6 cells, wound healing assays were  
63 performed. The cell suspensions were seeded into 24-well plates at  $3 \times 10^5$  cells/well. After culturing for 24 h, wounds  
64 were made by using a 1000 µL micropipette tip, and then the cells were treated with the indicated concentrations of  
65 recombinant mouse FGL1 protein (CUSABIO, Wuhan, China). The distance of the wounds was photographed after 0 and  
66 24 h scratching using an optical microscope (Mshot, Guangzhou, China). The relative migration distance of cells at 24 h  
67 was compared to the corresponding distance at 0 h using ImageJ software (National Institutes of Health, Bethesda, MD,  
68 USA).

69

70    **Database source and gene expression**

71    The mRNA expression level of *Fgl1* in human tissues was acquired from the Genotype-Tissue Expression (GTEx)  
72    database (<https://www.gtexportal.org/>), and that in mouse tissues was acquired from the BioGPS database  
73    (<http://biogps.org/>). Graphs were generated using Prism software (version 8.0.1; GraphPad, San Diego, CA, USA).

**Supplemental Table 1. Antibodies used for flow cytometry in this study**

| Fluorescence | Antibody                       | Company        | Catalog    | Clone       |
|--------------|--------------------------------|----------------|------------|-------------|
| FITC         | Anti-mouse CD69                | BD Biosciences | 553236     | H1.2F3      |
| FITC         | Anti-mouse CD226               | Biolegend      | 128803     | 10E5        |
| FITC         | Anti-mouse PD-1                | eBioscience    | 11-9985    | J43         |
| FITC         | Anti-mouse CD107a              | BD Biosciences | 553793     | 1D4B        |
| Percep-CY5.5 | Anti-mouse CD11b               | Biolegend      | 101228     | M1/70       |
| Percep-CY5.5 | Anti-mouse CD44                | BD Biosciences | 560570     | IM7         |
| Percep-CY5.5 | Anti-mouse-B220                | Biolegend      | 103236     | RA3-6B2     |
| Percep-CY5.5 | Anti-mouse IFN- $\gamma$       | Biolegend      | 505822     | XMG1.2      |
| Percep-CY5.5 | Anti-mouse Foxp3               | BD Biosciences | 563902     | R16-715     |
| PE           | Anti-mouse CD27                | Biolegend      | 124210     | LG.3A10     |
| PE           | Anti-mouse CD69                | BD Biosciences | 553237     | H1.2F3      |
| PE           | Anti-mouse NKG2A               | eBioscience    | 12-5897    | 16a11       |
| PE           | Anti-mouse MHCII               | eBioscience    | 12-5321    | M5/114.15.2 |
| PE           | Anti-mouse/human<br>Granzyme B | Biolegend      | 372208     | QA16A02     |
| PE-Cy7       | Anti-mouse CD49b               | Biolegend      | 108922     | DX5         |
| APC          | Anti-mouse NKG2D               | eBioscience    | 17-5882    | CX5         |
| APC          | Anti-mouse Siglec-H            | Biolegend      | 129612     | 551         |
| APC          | Anti-mouse Helios              | Biolegend      | 137222     | 22F6        |
| Alexa 660    | Anti-mouse Ki67                | eBioscience    | 50-5698-82 | SolA15      |
| BV421        | Anti-mouse NKG2D               | BD Biosciences | 562800     | CX5         |
| BV421        | Anti-mouse CD11c               | Biolegend      | 117330     | N418        |
| BV421        | Anti-mouse TNF- $\alpha$       | Biolegend      | 506328     | MP6-XT22    |
| BV510        | Anti-mouse CD4                 | BD Biosciences | 563106     | RM4-5       |
| BV510        | Anti-mouse CD45                | BD Biosciences | 563891     | 30-F11      |
| BV605        | Anti-mouse NK1.1               | Biolegend      | 108740     | PK136       |
| BV786        | Anti-mouse CD49a               | BD Biosciences | 740919     | Ha31/8      |
| BUV395       | Anti-mouse CD3e                | BD Biosciences | 563565     | 145-2C11    |

*Continued*

| Fluorescence | Antibody                | Company        | Catalog | Clone   |
|--------------|-------------------------|----------------|---------|---------|
| BUV395       | Anti-mouse TCR- $\beta$ | BD Biosciences | 742485  | H57-597 |
| BUV563       | Anti-mouse CD4          | BD Biosciences | 565709  | GK1.5   |
| BUV737       | Anti-mouse CD8 $\alpha$ | BD Biosciences | 564297  | 53-6.7  |

**Supplemental Figure 1**

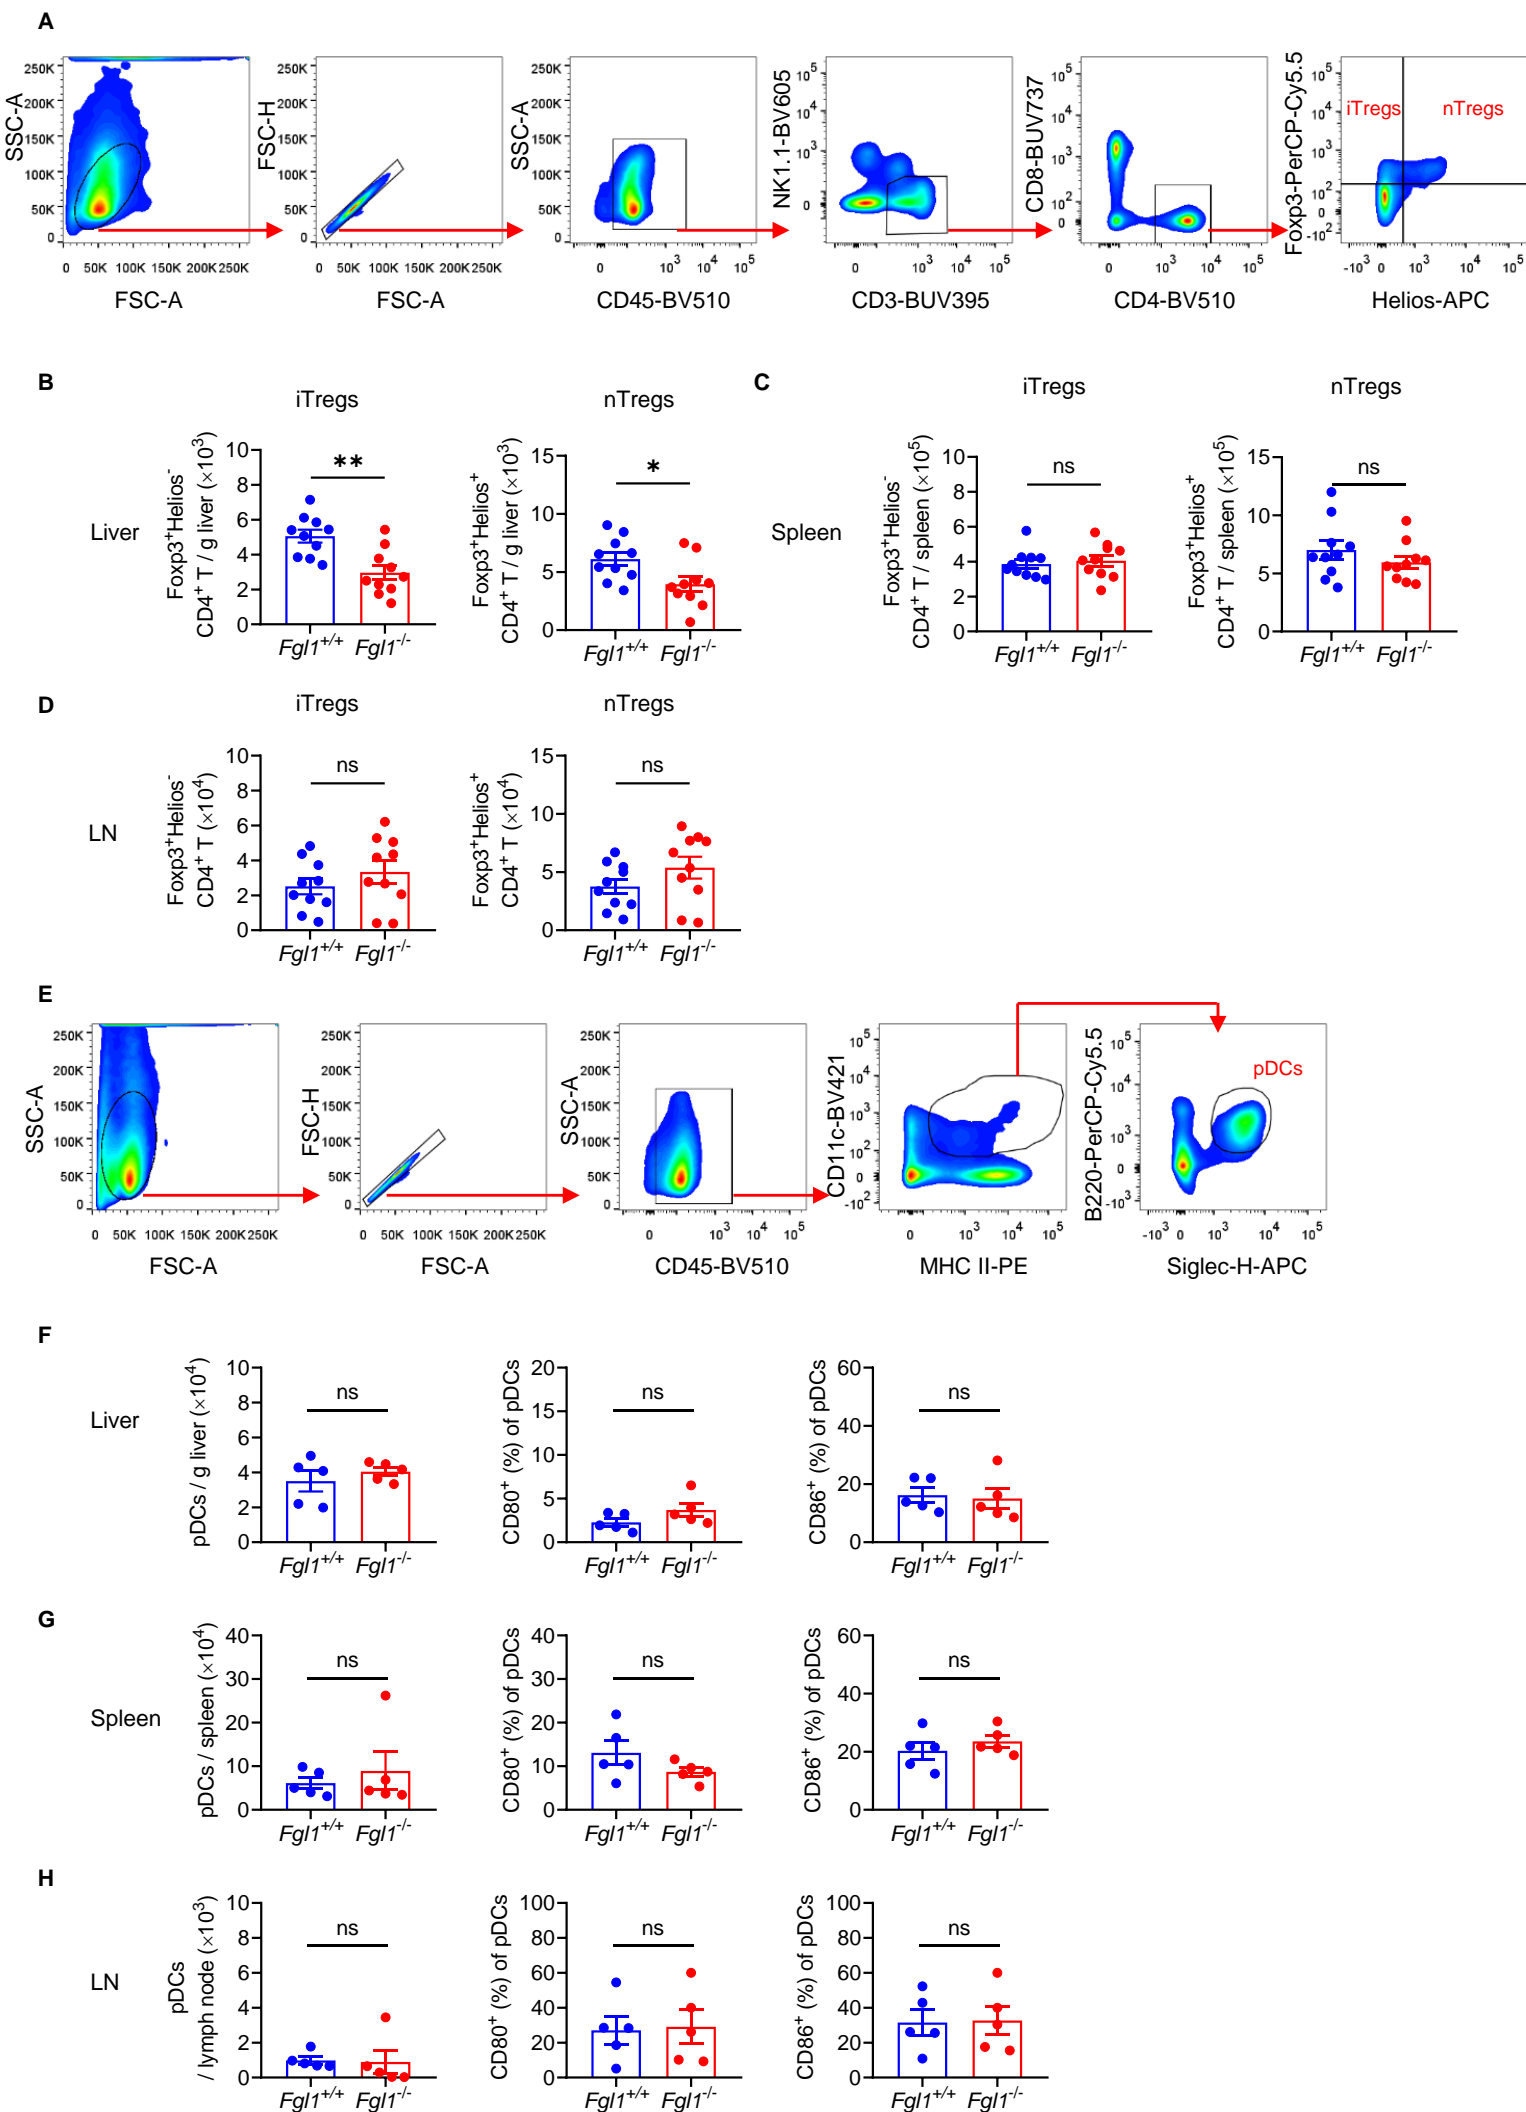

**Supplemental Figure 1. Tregs and pDCs in the liver, spleen and lymph nodes of *Fgl1*-deficient mice compared with control mice.** Livers, spleens and lymph nodes were harvested from *Fgl1*<sup>+/+</sup> and *Fgl1*<sup>-/-</sup> mice, and then MNCs were isolated and analyzed by flow cytometry. (A) Gating strategies for analysis of iTregs (Foxp3<sup>+</sup>Helios<sup>-</sup>CD4<sup>+</sup> T cells) and nTregs (Foxp3<sup>+</sup>Helios<sup>+</sup>CD4<sup>+</sup> T cells). Absolute numbers of iTregs and nTregs in the liver (B), spleen (C) and lymph node (D) of *Fgl1*<sup>+/+</sup> and *Fgl1*<sup>-/-</sup> mice (n = 10/group). Data are pooled from two independent experiments. (E) Gating strategies for analysis of plasmacytoid dendritic cells (pDCs, CD45<sup>+</sup>CD11c<sup>+</sup>MHCII<sup>+</sup>Siglec-H<sup>+</sup>B220<sup>+</sup> cells). Absolute numbers of pDCs (left) and frequencies of CD80 (middle) and CD86 (right) on pDCs in the liver (F), spleen (G) and lymph node (H) of *Fgl1*<sup>+/+</sup> and *Fgl1*<sup>-/-</sup> mice (n = 5/group). Representative of two independent experiments were shown. Comparisons were performed by using two-tailed unpaired Student's *t* test. Data are presented as the mean ± SEM (B-D, F-H). \*\**P* < 0.01, \**P* < 0.05. ns, not significant.



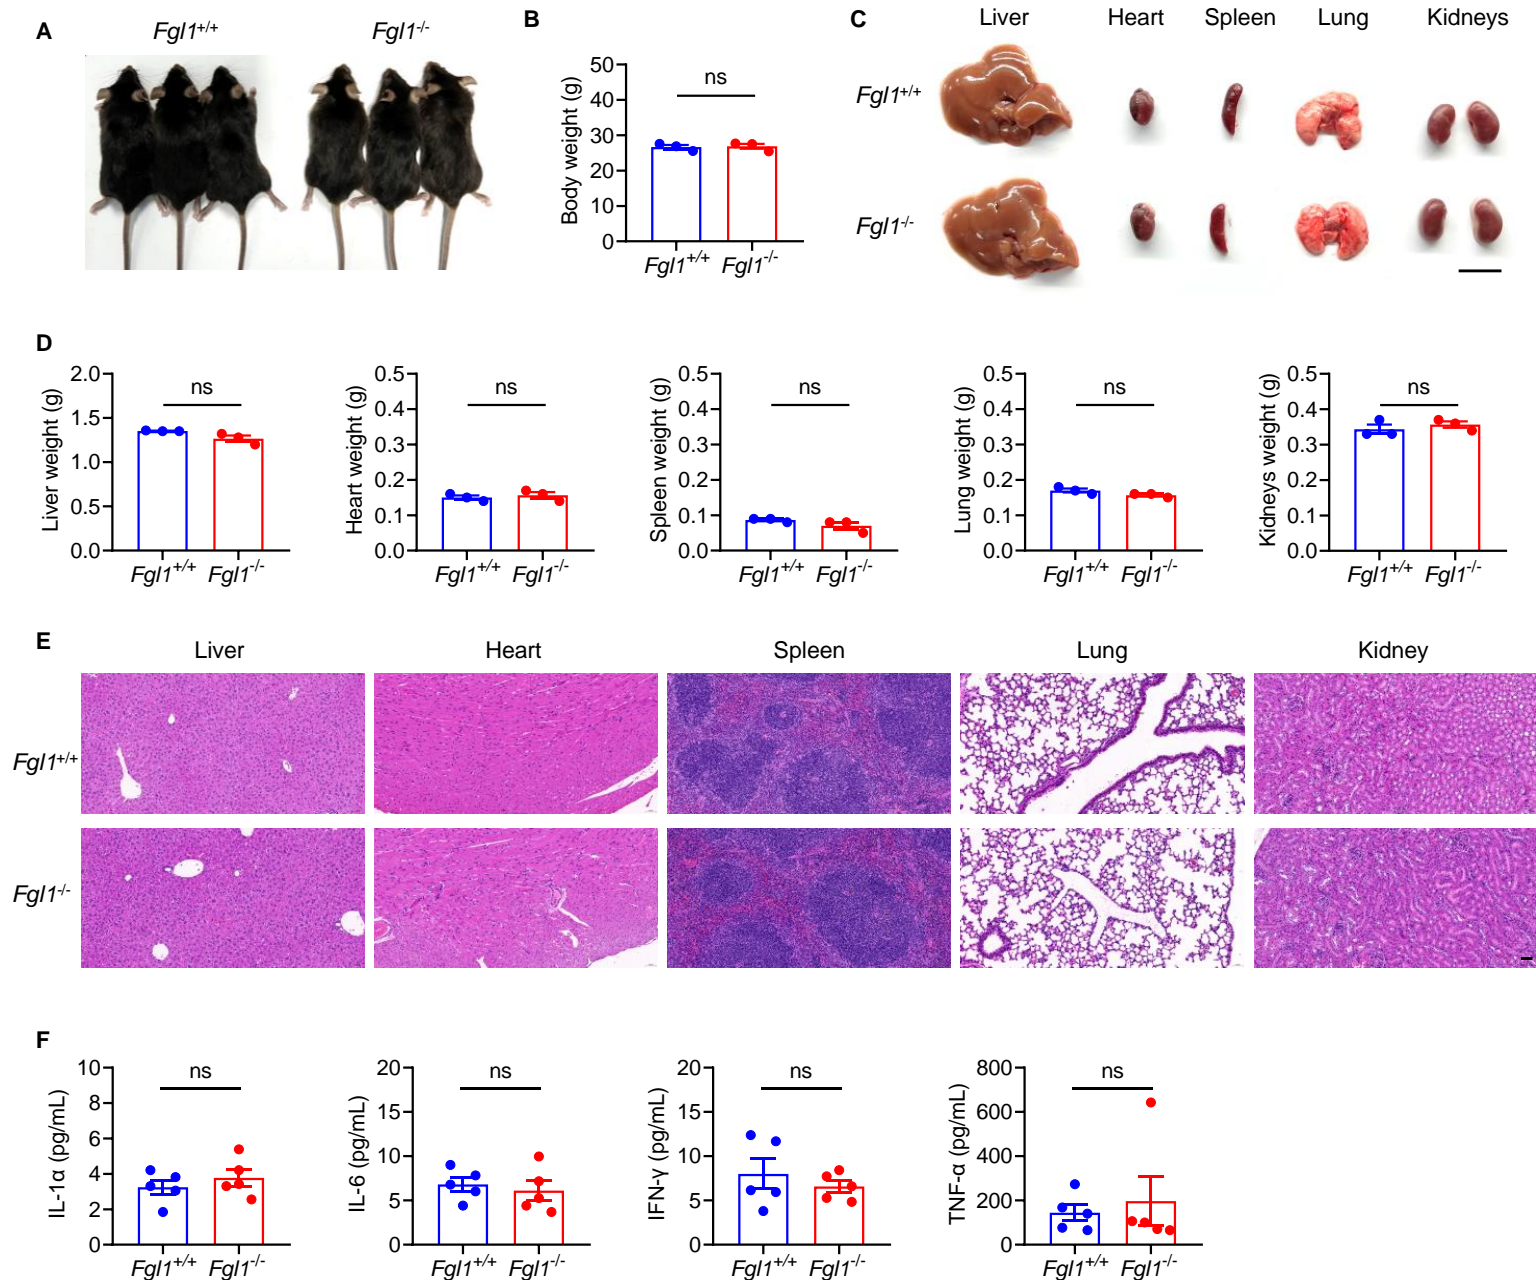

**Supplemental Figure 2. No obvious changes are observed in adult *Fgl1*<sup>-/-</sup> mice compared with WT control mice.** *Fgl1*<sup>+/+</sup> and *Fgl1*<sup>-/-</sup> mice were harvested, and the main organs were collected. (A) Representative photograph of *Fgl1*<sup>+/+</sup> and *Fgl1*<sup>-/-</sup> mice (n = 3/group). (B) Body weight of *Fgl1*<sup>+/+</sup> and *Fgl1*<sup>-/-</sup> mice (n = 3/group). (C) Representative photograph of liver, heart, spleen, lung and kidneys from *Fgl1*<sup>+/+</sup> and *Fgl1*<sup>-/-</sup> mice (Bar, 1 cm). (D) Weight of liver, heart, spleen, lung and kidneys from *Fgl1*<sup>+/+</sup> and *Fgl1*<sup>-/-</sup> mice (n = 3/group). (E) Representative histopathological images of liver, heart, spleen, lung and kidney from *Fgl1*<sup>+/+</sup> and *Fgl1*<sup>-/-</sup> mice (Bar, 50  $\mu$ m). (F) The serum levels of IL-1 $\alpha$ , IL-6, IFN- $\gamma$  and TNF- $\alpha$  in *Fgl1*<sup>+/+</sup> and *Fgl1*<sup>-/-</sup> mice (n = 5/group). Comparisons were performed by using two-tailed unpaired Student's *t* test (B, D, F). Data are presented as the mean  $\pm$  SEM (B, D, F). ns, not significant

**A**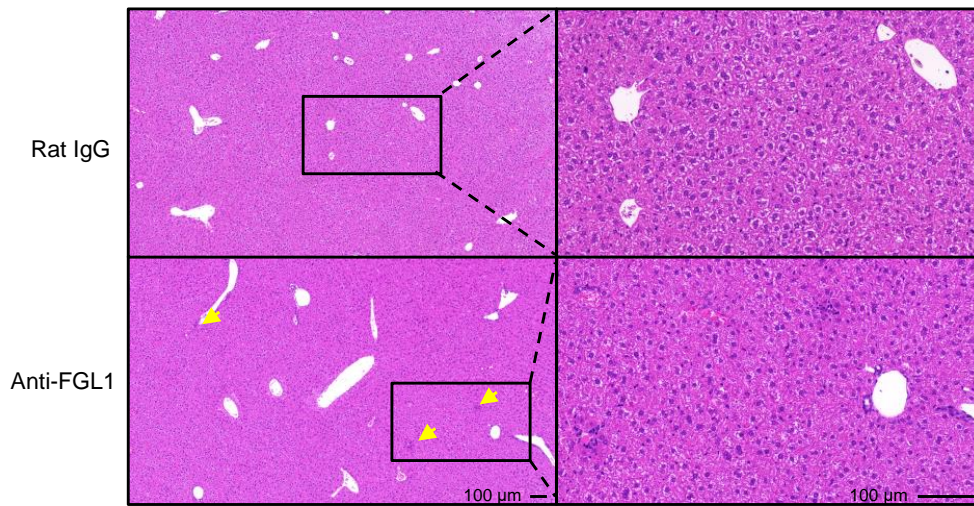**B**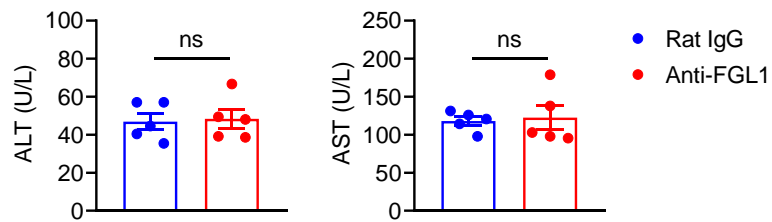

**Supplemental Figure 3. Anti-FGL1 mAb treatment does not cause liver injury.** WT mice were injected intraperitoneally (i.p.) with anti-FGL1 mAb (200  $\mu\text{g}$ ) or control rat IgG (200  $\mu\text{g}$ ) at day 0 and day 2, and then at day 3, serum and liver samples were harvested. **(A)** Representative histopathological images of livers. Bar, 100  $\mu\text{m}$ . **(B)** The serum levels of ALT and AST ( $n = 5/\text{group}$ ). Comparisons were performed by using two-tailed unpaired Student's  $t$  test **(B)**. Data are presented as the mean  $\pm$  SEM. ns, not significant.

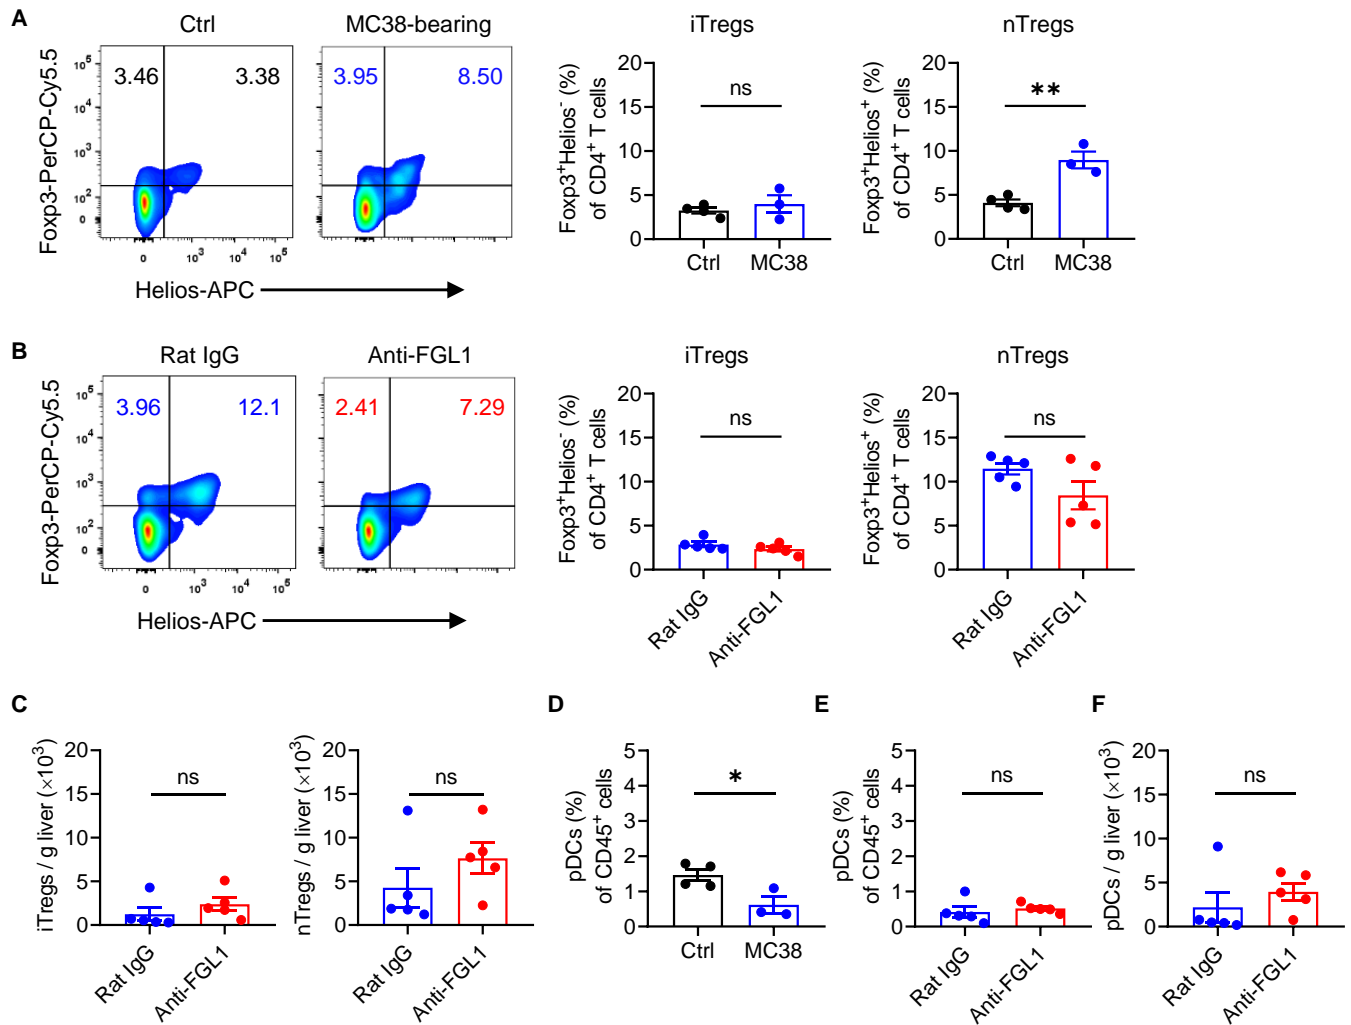

**Supplemental Figure 4. Anti-FGL1 treatment affects Tregs and pDCs slightly.** WT mice were intrasplenically (i.s.) challenged with  $2 \times 10^5$  MC38 tumor cells. At 18 days after challenge, MNCs were isolated from livers and analyzed by flow cytometry analysis. **(A)** Representative plot (left) and frequency (right) of iTregs (Fop3<sup>+</sup>Helios<sup>-</sup>CD4<sup>+</sup> T cells) and nTregs (Fop3<sup>+</sup>Helios<sup>+</sup>CD4<sup>+</sup> T cells) in the liver of control mice and MC38-bearing mice (left). (n = 4 for the control group; n = 3 for the MC38-bearing group). MC38-challenged mice were treated intraperitoneally (i.p.) with 250  $\mu$ g anti-FGL1 mAb or control rat IgG 4 days after tumor cell challenge 4 times (once every 4 days). **(B)** Representative plot (left) and frequency (right) and **(C)** absolute numbers of iTregs and nTregs in the liver on day 23 after MC38 challenge in anti-FGL1-treated mice and control mice (n = 5/group). **(D)** Frequency of plasmacytoid dendritic cells (pDCs, CD45<sup>+</sup>CD11c<sup>+</sup>MHC II<sup>+</sup>Siglec-H<sup>+</sup>B220<sup>+</sup> cells) in the liver of control mice (n = 4) and MC38-bearing mice (n = 3) on day 18 after challenge. **(E)** Frequency and **(F)** absolute numbers of pDCs in the liver on day 23 after MC38 challenge in anti-FGL1-treated mice and control mice (n = 5/group). Data are representative of two independent experiments. Comparisons were performed by using two-tailed unpaired Student's *t* test (**A-F**). Data are presented as the mean  $\pm$  SEM. \*\**P* < 0.01, \**P* < 0.05. ns, not significant.

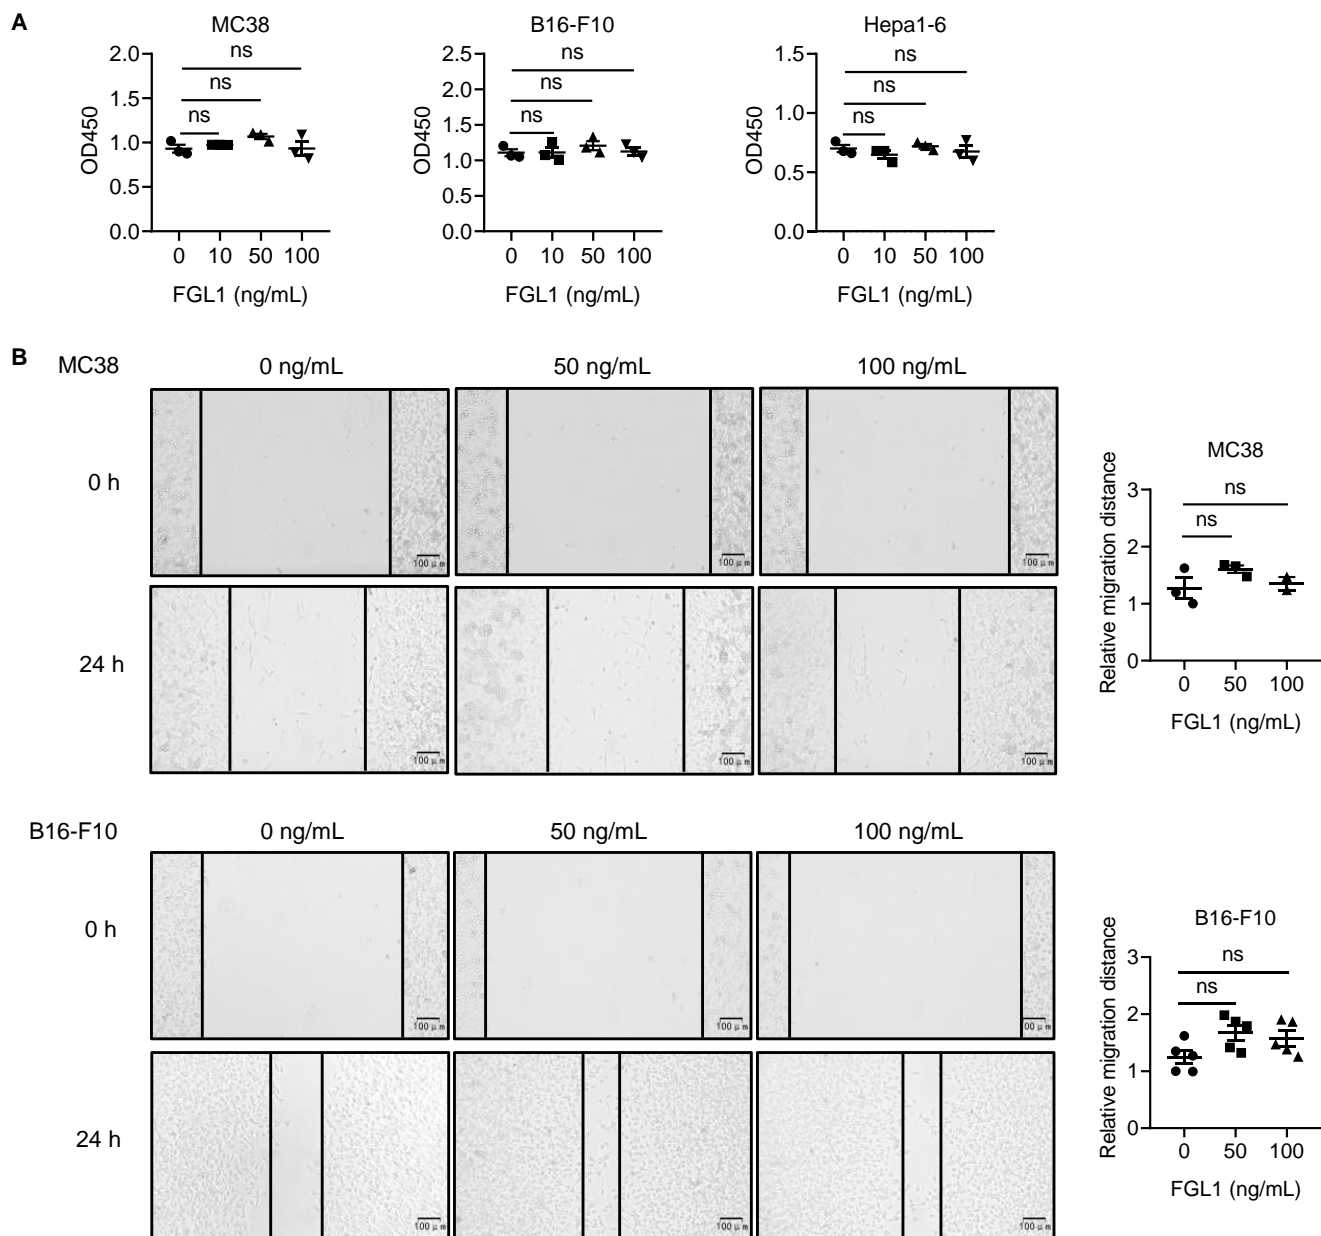

**Supplemental Figure 5. Recombinant mouse FGL1 protein has no direct effects on the proliferation and migration of tumor cells.** MC38, B16-F10 and Hepa1-6 tumor cells were treated with a series of concentrations of recombinant mouse FGL1 protein. **(A)** Proliferation of MC38, B16-F10 and Hepa1-6 tumor cells tested by Cell Counting Kit-8 assay. **(B)** Migration of MC38 and B16-F10 tumor cells assessed by wound healing assay. Representative photographs of tumor cells (left) and the relative migration distance of tumor cells (right) are shown. Comparisons were performed by using one-way ANOVA followed by Tukey's multiple comparisons test **(A, B)**. Data are presented as the mean  $\pm$  SEM. ns, not significant.
